# Supplementary material
Source: PubMed Central journal article supplement (PMC3592012)
Supplement: JB.02067-12_zjb999092477so1.pdf [file JB.02067-12_zjb999092477so1.pdf]

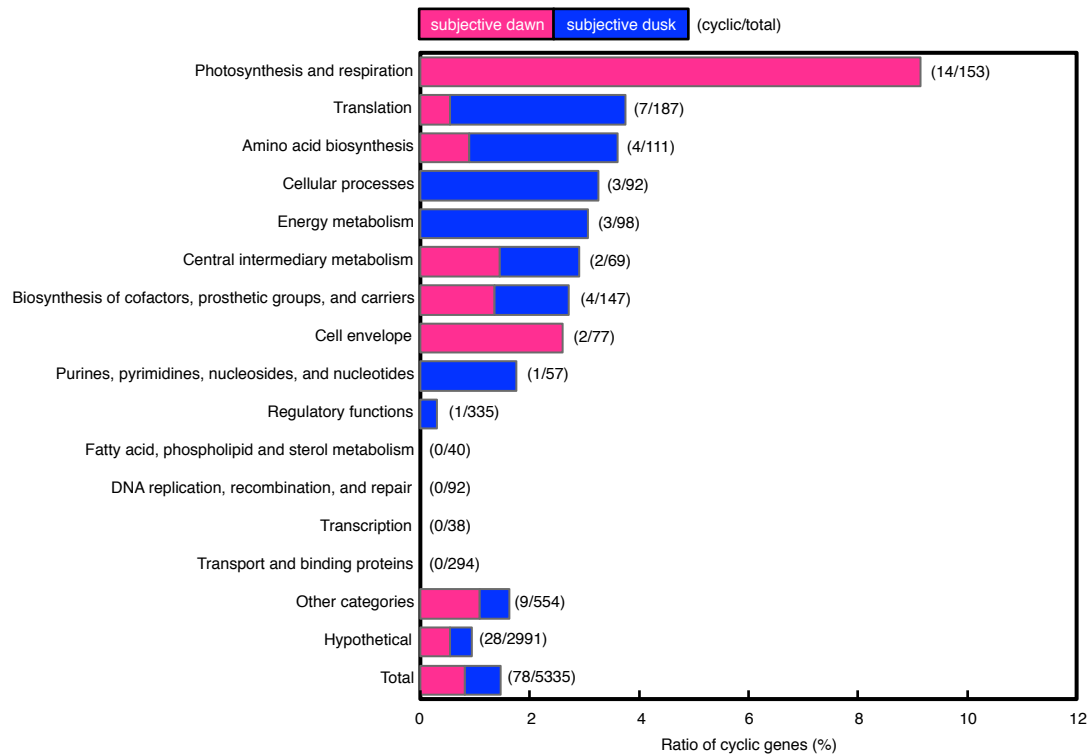

**FIGURE S1.** Functional categories of clock-controlled genes.

The clock-controlled genes in *Anabaena* were classified according to their functional categories. The proportions of clock-controlled genes in the total genes in each category are shown as a stacked bar graph. Red and blue bars indicate the proportions of dawn- and dusk-induced genes, respectively, out of the total cycling genes in each category. The numbers of cyclic genes and total genes in each category are shown in parentheses.

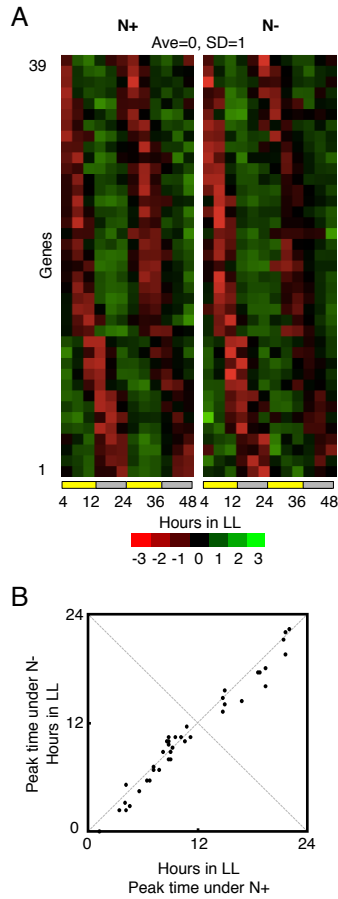

**FIGURE S2.** Genome-wide circadian expression profiles of common clock-controlled genes in the presence and absence of nitrate.

**A.** Expression profiles of 39 cycling genes commonly expressed in the absence (N<sup>-</sup>) or presence (N<sup>+</sup>) of sodium nitrate, sorted by peak time under nitrate-replete conditions (N<sup>+</sup>). The results of two independent experiments (N<sup>+</sup>) and a single series of experiments (N<sup>-</sup>) are shown. The data are represented as for Fig. 2B. **B.** Variations in the peak time of each gene in the presence (N<sup>+</sup>) or absence (N<sup>-</sup>) of sodium nitrate.

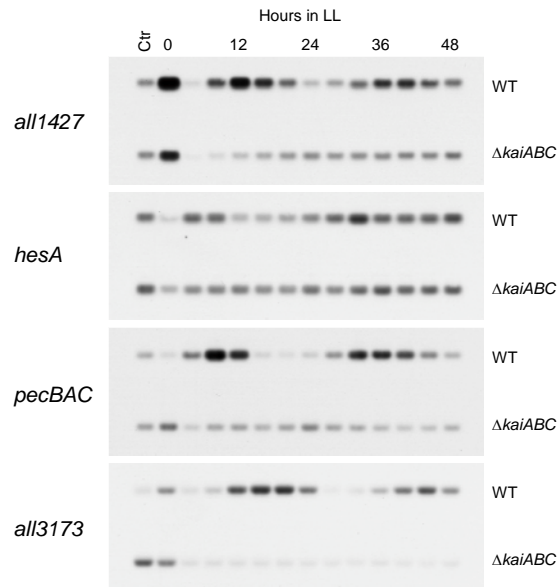

**FIGURE S3.** Nullification of transcription rhythms of heterocyst-specific genes and representative high-amplitude genes by genetic disruption of the *kaiABC* cluster in the absence of combined nitrogen. Northern blot analysis using the total RNAs extracted from wild-type (WT) and *kaiABC*-null mutant ( $\Delta kaiABC$ ) cells with each genes-specific probe are shown. Circadian expression of *all1427*, *hesA*, *pecBAC* and *all3173* genes was nullified in the *kaiABC*-null mutant strain. We loaded samples collected at hour 48 in LL under different ( $\Delta kaiABC$  for WT, WT for  $\Delta kaiABC$ ) strains as control samples indicated by “Ctr”.

**Table S1. *Anabaena* strains used in this study**

| <b>Strains</b> | <b>Genotype</b>    | <b>Reporter cassette</b>                 | <b>Host Strain</b> | <b>DNA used for transformation</b> | <b>Marker*</b> | <b>References</b> |
|----------------|--------------------|------------------------------------------|--------------------|------------------------------------|----------------|-------------------|
| ILC292         | Wild type          | <i>Palr0523::luxAB, Pall0011::luxCDE</i> | <i>Anabaena</i> WT | pIL407                             | Km, Nm         | This study        |
| ILC379         | Wild type          | <i>Pall3173::luxAB, Pall0011::luxCDE</i> | <i>Anabaena</i> WT | pIL411                             | Km, Nm         | This study        |
| ILC352         | <i>kaiABC-null</i> | none                                     | <i>Anabaena</i> WT | pIL204                             | Sp             | This study        |
| ILC505         | <i>kaiABC-null</i> | <i>Palr0523::luxAB, Pall0011::luxCDE</i> | ILC352             | pIL407                             | Km, Nm, Sp     | This study        |
| ILC507         | <i>kaiABC-null</i> | <i>Pall3173::luxAB, Pall0011::luxCDE</i> | ILC352             | pIL411                             | Km, Nm, Sp     | This study        |

\*Km, Nm and Sp represent kanamycin-, neomycin- and spectinomycin/streptomycin-resistant genes, respectively.

**Table S2. List of 78 'cycling' genes.**

Definition of correlation *p*-value and *amplitude* was described in the text.

\*All tested genes are classified into "Arrhythmic" (AR) and "Cycling" genes using the standard (*b*: *p*-value of < 0.05 and *amplitude* of > 10<sup>-0.7</sup>).

more stringent (*a*: *p*-value of < 0.01 and *amplitude* of > 10<sup>-0.6</sup>) or less stringent (*c*: *p*-value of < 0.1 and *amplitude* of > 10<sup>-0.8</sup>) filtering conditions under nitrogen supplemented conditions (*n*=2).

\*\*Under nitrogen deprivation, genes are classified into AR or Cycling genes using the same filtration methods, while one series of experiments were performed (*n*=1).

| ORF No. | Gene name     | Annotation                                                       | peak time (N+, n=2) | <i>p</i> -value (N+, n=2) | <i>amplitude</i> (N+, n=2) | Cycling property (N+, n=2)* | peak time (N-, n=1) | <i>p</i> -value (N-, n=1) | <i>amplitude</i> (N-, n=1) | Cycling property (N-, n=1)** |
|---------|---------------|------------------------------------------------------------------|---------------------|---------------------------|----------------------------|-----------------------------|---------------------|---------------------------|----------------------------|------------------------------|
| al0232  | -             | hypothetical protein                                             | 10.8                | 0.007                     | 0.273                      | a                           | 11.6                | 0.010                     | 0.364                      | b                            |
| al0333  | -             | hypothetical protein                                             | 10.6                | 0.008                     | 0.338                      | a                           | 10                  | 0.003                     | 0.470                      | a                            |
| al0334  | -             | hypothetical protein                                             | 9                   | 0.011                     | 0.335                      | b                           | 8.8                 | 0.002                     | 0.439                      | a                            |
| al0605  | -             | NirB-like protein                                                | 13.2                | 0.029                     | 0.268                      | b                           | -                   | -                         | -                          | AR                           |
| al0713  | <i>glgB</i>   | 1,4-alpha-glucan branching enzyme                                | 7.8                 | 0.008                     | 0.301                      | a                           | 6.8                 | 0.030                     | 0.323                      | b                            |
| al0888  | -             | ribose 5-phosphate isomerase                                     | 21.8                | 0.019                     | 0.232                      | b                           | 20.8                | 0.041                     | 0.166                      | c                            |
| al11272 | -             | probable glycogen phosphorylase                                  | 15                  | 0.028                     | 0.676                      | b                           | 15.6                | 0.003                     | 0.538                      | a                            |
| al11353 | -             | putative hydrolase                                               | 7.2                 | 0.031                     | 0.206                      | b                           | 6.8                 | 0.033                     | 0.381                      | b                            |
| al11743 | <i>por</i>    | light-dependent NADPH-protochlorophyllide oxidoreductase         | 8.6                 | 0.042                     | 0.340                      | b                           | 10                  | 0.017                     | 0.365                      | b                            |
| al11797 | -             | unknown protein                                                  | 6.4                 | 0.043                     | 0.349                      | b                           | 5.6                 | 0.003                     | 0.497                      | a                            |
| al11897 | -             | heme oxygenase                                                   | 8.2                 | 0.007                     | 0.450                      | a                           | 8.8                 | 0.046                     | 0.402                      | b                            |
| al12327 | <i>apcF</i>   | allophycocyanin beta-18 subunit                                  | 8.8                 | 0.005                     | 0.337                      | a                           | 8                   | 0.035                     | 0.421                      | b                            |
| al12566 | <i>gap1</i>   | glyceraldehyde-3-phosphate dehydrogenase                         | 16.8                | 0.020                     | 0.476                      | b                           | 14.4                | 0.008                     | 0.517                      | a                            |
| al12567 | -             | hypothetical protein                                             | 14.8                | 0.043                     | 0.527                      | b                           | 14.8                | 0.023                     | 1.032                      | b                            |
| al12906 | <i>moeB</i>   | molybdopterin biosynthesis protein                               | 18.8                | 0.040                     | 0.250                      | b                           | 17.6                | 0.018                     | 0.224                      | b                            |
| al13173 | -             | hypothetical protein                                             | 18.6                | 0.007                     | 0.708                      | a                           | 17.6                | 0.001                     | 0.712                      | a                            |
| al13259 | -             | hypothetical protein                                             | 10.8                | 0.028                     | 0.203                      | b                           | -                   | -                         | -                          | AR                           |
| al13319 | -             | hypothetical protein                                             | 12                  | 0.009                     | 0.365                      | a                           | -                   | -                         | -                          | AR                           |
| al13516 | -             | unknown protein                                                  | 19.4                | 0.021                     | 0.206                      | b                           | 16                  | 0.020                     | 0.214                      | b                            |
| al13572 | <i>psbAIV</i> | photosystem II reaction center D1 protein                        | 5.4                 | 0.044                     | 0.415                      | b                           | -                   | -                         | -                          | AR                           |
| al13941 | -             | unknown protein                                                  | 8.8                 | 0.042                     | 0.391                      | b                           | -                   | -                         | -                          | AR                           |
| al14103 | <i>ribG</i>   | riboflavin-specific deaminase                                    | 20.8                | 0.033                     | 0.268                      | b                           | 20.8                | 0.064                     | 0.265                      | c                            |
| al14189 | -             | tRNA-pseudouridine synthase I                                    | 22                  | 0.024                     | 0.379                      | b                           | -                   | -                         | -                          | AR                           |
| al14197 | <i>secY</i>   | preprotein translocase SecY subunit                              | 21.8                | 0.025                     | 0.329                      | b                           | -                   | -                         | -                          | AR                           |
| al14336 | <i>rps10</i>  | 30S ribosomal protein S10                                        | 22.2                | 0.039                     | 0.445                      | b                           | 20.4                | 0.090                     | 0.307                      | c                            |
| al14349 | -             | unknown protein                                                  | 22                  | 0.043                     | 0.341                      | b                           | -                   | -                         | -                          | AR                           |
| al14563 | <i>lda</i>    | fructose-1,6-bisphosphate aldolase                               | 5.6                 | 0.029                     | 0.472                      | b                           | 4.4                 | 0.046                     | 0.392                      | b                            |
| al14578 | -             | unknown protein                                                  | 22.2                | 0.034                     | 0.390                      | b                           | -                   | -                         | -                          | AR                           |
| al14822 | -             | similar to beta-lactamase                                        | 21.6                | 0.039                     | 0.222                      | b                           | 22                  | 0.050                     | 0.253                      | b                            |
| al15062 | <i>gap2</i>   | glyceraldehyde-3-phosphate dehydrogenase                         | 4.2                 | 0.030                     | 0.401                      | b                           | 2.4                 | 0.010                     | 0.249                      | b                            |
| alr0020 | <i>apcE</i>   | phycobilisome core-membrane linker polypeptide Lcm, allophy      | 8.8                 | 0.011                     | 0.510                      | b                           | 10                  | 0.035                     | 0.538                      | b                            |
| alr0022 | <i>apcB</i>   | allophycocyanin beta subunit                                     | 8.6                 | 0.003                     | 0.304                      | a                           | -                   | -                         | -                          | AR                           |
| alr0515 | -             | hypothetical protein                                             | 22.6                | 0.036                     | 0.336                      | b                           | 19.2                | 0.088                     | 0.175                      | c                            |
| alr0523 | <i>pecB</i>   | phycoerythrocyanin beta chain                                    | 11.2                | 0.034                     | 0.526                      | b                           | 10.4                | 0.001                     | 0.741                      | a                            |
| alr0524 | <i>pecA</i>   | phycoerythrocyanin alpha chain                                   | 9.6                 | 0.002                     | 0.656                      | a                           | 10.4                | 0.007                     | 0.950                      | a                            |
| alr0525 | <i>pecC</i>   | phycoerythrocyanin-associated rod linker protein                 | 10.2                | 0.005                     | 0.592                      | a                           | 10.4                | 0.002                     | 0.802                      | a                            |
| alr0530 | <i>cpcC</i>   | phycobilisome rod linker polypeptide Lr, phycocyanin-associat    | 8.8                 | 0.035                     | 0.477                      | b                           | 10.4                | 0.024                     | 0.390                      | b                            |
| alr0532 | <i>cpcE</i>   | phycocyanin alpha subunit phycocyanobilin lyase, CpcE subuni     | 9.4                 | 0.007                     | 0.390                      | a                           | -                   | -                         | -                          | AR                           |
| alr0533 | <i>cpcF</i>   | phycocyanin alpha subunit phycocyanobilin lyase, CpcF subuni     | 9.2                 | 0.009                     | 0.370                      | a                           | 9.2                 | 0.010                     | 0.601                      | b                            |
| alr0535 | <i>cpcG2</i>  | phycobilisome rod-core linker polypeptide Lrc, C-phycocyanin     | 8.8                 | 0.022                     | 0.462                      | b                           | 9.6                 | 0.011                     | 0.448                      | b                            |
| alr0545 | -             | probable pseudouridine synthase                                  | 9                   | 0.039                     | 0.342                      | b                           | 8                   | 0.007                     | 0.325                      | a                            |
| alr0577 | -             | EKBP-type peptidyl-prolyl cis-trans isomerase                    | 8                   | 0.037                     | 0.310                      | b                           | -                   | -                         | -                          | AR                           |
| alr0608 | <i>nrtA</i>   | ABC-type nitrate/nitrite transport system substrate-binding prot | 12.6                | 0.045                     | 0.316                      | b                           | -                   | -                         | -                          | AR                           |
| alr0609 | <i>nrtB</i>   | ABC-type nitrate/nitrite transport system permease protein       | 12.8                | 0.049                     | 0.238                      | b                           | -                   | -                         | -                          | AR                           |
| alr0611 | <i>nrtD</i>   | ABC-type nitrate/nitrite transport system ATP-binding protein    | 13                  | 0.010                     | 0.285                      | a                           | -                   | -                         | -                          | AR                           |
| alr0612 | <i>narB</i>   | ferredoxin--nitrate reductase                                    | 11.6                | 0.046                     | 0.231                      | b                           | -                   | -                         | -                          | AR                           |
| alr0683 | -             | hypothetical protein                                             | 23                  | 0.049                     | 0.319                      | b                           | -                   | -                         | -                          | AR                           |
| alr1674 | -             | hypothetical protein                                             | 8.2                 | 0.047                     | 0.346                      | b                           | 5.6                 | 0.057                     | 0.290                      | c                            |
| alr1690 | -             | cell wall-binding protein                                        | 8.6                 | 0.028                     | 0.275                      | b                           | -                   | -                         | -                          | AR                           |
| alr2311 | <i>rhpF</i>   | RNA-binding protein                                              | 18.8                | 0.042                     | 0.265                      | b                           | -                   | -                         | -                          | AR                           |
| alr2885 | <i>kaiB</i>   | circadian oscillation regulator                                  | 21                  | 0.046                     | 0.246                      | b                           | 16                  | 0.065                     | 0.213                      | c                            |
| alr3606 | -             | dihydroliipoamide S-acetyltransferase                            | 21.8                | 0.050                     | 0.237                      | b                           | -                   | -                         | -                          | AR                           |
| alr3662 | <i>groEL</i>  | chaperonin GroEL                                                 | 19.4                | 0.019                     | 0.626                      | b                           | 18                  | 0.004                     | 0.539                      | a                            |
| alr3692 | -             | hypothetical protein                                             | 15                  | 0.004                     | 0.535                      | a                           | 14                  | 0.030                     | 0.956                      | b                            |
| alr3843 | <i>hoxR</i>   | rubredoxin                                                       | 4.2                 | 0.010                     | 0.266                      | b                           | 4.8                 | 0.065                     | 0.314                      | c                            |
| alr3844 | -             | hypothetical protein                                             | 6.8                 | 0.048                     | 0.372                      | b                           | 5.6                 | 0.016                     | 0.354                      | b                            |
| alr4077 | -             | hypothetical protein                                             | 3.4                 | 0.007                     | 0.477                      | a                           | 2.4                 | 0.007                     | 0.341                      | a                            |
| alr4156 | <i>ndhF3</i>  | NADH dehydrogenase subunit 5                                     | 4.2                 | 0.018                     | 0.258                      | b                           | 5.2                 | 0.012                     | 0.251                      | b                            |
| alr4777 | -             | hypothetical protein                                             | 4.6                 | 0.029                     | 0.271                      | b                           | 2.8                 | 0.043                     | 0.307                      | b                            |
| alr4784 | -             | adenylosuccinate synthetase                                      | 20.2                | 0.022                     | 0.340                      | b                           | -                   | -                         | -                          | AR                           |
| alr4939 | -             | unknown protein                                                  | 7.2                 | 0.046                     | 0.449                      | b                           | 7.2                 | 0.005                     | 0.479                      | a                            |
| alr4957 | -             | hypothetical protein                                             | 9.6                 | 0.021                     | 0.203                      | b                           | 10.4                | 0.065                     | 0.298                      | c                            |
| alr5275 | -             | 6-phosphogluconate dehydrogenase                                 | 16                  | 0.038                     | 0.491                      | b                           | -                   | -                         | -                          | AR                           |
| alr5286 | -             | probable short-chain dehydrogenase                               | 1.2                 | 0.024                     | 0.419                      | b                           | 0                   | 0.006                     | 0.458                      | a                            |

|         |              |                                                                 |      |       |       |   |   |      |       |       |    |
|---------|--------------|-----------------------------------------------------------------|------|-------|-------|---|---|------|-------|-------|----|
| alr5299 | <i>musG</i>  | transcription antitermination protein                           | 21.2 | 0.027 | 0.307 | b | - | -    | -     | AR    |    |
| alr5302 | <i>rpl10</i> | 50S ribosomal protein L10                                       | 21.4 | 0.013 | 0.362 | b | - | 21.2 | 0.024 | 0.235 | b  |
| alr5303 | <i>rpl12</i> | 50S ribosomal protein L12                                       | 22   | 0.003 | 0.387 | a | - | 22.4 | 0.012 | 0.245 | b  |
| asl0597 | -            | hypothetical protein                                            | 8.4  | 0.039 | 0.631 | b | - | -    | -     | -     | AR |
| asl3322 | -            | unknown protein                                                 | 14.8 | 0.024 | 0.404 | b | - | 13.2 | 0.012 | 0.447 | b  |
| asl3518 | -            | unknown protein                                                 | 21   | 0.022 | 0.309 | b | - | -    | -     | -     | AR |
| asl4207 | <i>rpl29</i> | 50S ribosomal protein L29                                       | 20.4 | 0.034 | 0.513 | b | - | -    | -     | -     | AR |
| asr0023 | <i>apcC</i>  | phycobilisome small core linker polypeptide Lc, allophycocyanin | 8.8  | 0.004 | 0.401 | a | - | -    | -     | -     | AR |
| asr0461 | -            | unknown protein                                                 | 8.8  | 0.039 | 0.356 | b | - | -    | -     | -     | AR |
| asr0531 | <i>cpcD</i>  | phycobilisome small rod linker polypeptide Lr, phycocyanin-as   | 10   | 0.017 | 0.260 | b | - | -    | -     | -     | AR |
| asr1667 | -            | unknown protein                                                 | 4    | 0.038 | 0.752 | b | - | 3.2  | 0.015 | 0.739 | b  |
| asr2665 | -            | unknown protein                                                 | 10.4 | 0.018 | 0.330 | b | - | -    | -     | -     | AR |
| asr3168 | -            | hypothetical protein                                            | 21.6 | 0.002 | 0.293 | a | - | 19.6 | 0.012 | 0.215 | b  |
| asr5298 | <i>secE</i>  | secretory protein                                               | 21.2 | 0.034 | 0.342 | b | - | -    | -     | -     | AR |

**TABLE S3. Genes highly upregulated in heterocysts under nitrogen deprivation.**

$R_i$ ,  $I_i$ ,  $Sum(N-)/Sum(N+)$  values are defined as described in the text.

\*All tested genes are classified into "Arrhythmic" (AR) and "Cycling" genes using the standard ( $b$ :  $p$ -value of  $< 0.05$  and amplitude of  $> 10^{-0.7}$ ),

more stringent ( $a$ :  $p$ -value of  $< 0.01$  and amplitude of  $> 10^{-0.6}$ ) or less stringent ( $c$ :  $p$ -value of  $< 0.1$  and amplitude of  $> 10^{-0.8}$ ) filtering conditions under nitrogen deprivation ( $n=1$ ).

| ORF No. | Gene name   | Annotation                                                                              | $R_i$ value | $I_i$ value | $Sum(N-)/Sum(N+)$ | Cycling property* | Peak time |
|---------|-------------|-----------------------------------------------------------------------------------------|-------------|-------------|-------------------|-------------------|-----------|
| all1440 | <i>nifK</i> | nitrogenase MoFe protein subunit beta                                                   | 8.981       | 310.929     | 13.087            | AR                | -         |
| alr5358 | <i>hetN</i> | ketoacyl reductase                                                                      | 8.904       | 244.936     | 4.506             | AR                | -         |
| asl1434 | -           | hypothetical protein                                                                    | 8.427       | 102.039     | 5.452             | AR                | -         |
| all1457 | <i>nifS</i> | nitrogenase cofactor synthesis protein                                                  | 7.450       | 41.877      | 4.350             | AR                | -         |
| all1439 | -           | hypothetical protein                                                                    | 7.200       | 35.578      | 4.099             | AR                | -         |
| alr2731 | <i>ctaC</i> | ARTO, homolog of cytochrome c oxidase subunit II                                        | 7.091       | 33.283      | 3.275             | AR                | -         |
| all1517 | <i>nifB</i> | nitrogen fixation protein                                                               | 7.035       | 32.189      | 4.698             | AR                | -         |
| all1455 | <i>nifH</i> | nitrogenase iron protein, Fe-protein, dinitrogenase reductase, nitrogenase component II | 6.942       | 30.476      | 49.624            | AR                | -         |
| all1427 | -           | hypothetical protein                                                                    | 6.744       | 27.277      | 8.066             | b                 | 13.2      |
| alr5360 | -           | hypothetical protein                                                                    | 6.299       | 21.616      | 3.499             | AR                | -         |
| all1516 | <i>fdxN</i> | ferredoxin-like protein (fdxN)                                                          | 5.790       | 16.923      | 3.285             | AR                | -         |
| asl1516 | <i>fdxN</i> | ferredoxin-like protein (fdxN)                                                          | 5.700       | 16.227      | 3.186             | AR                | -         |
| all1432 | <i>hesA</i> | HesA protein                                                                            | 5.659       | 15.922      | 3.894             | c                 | 3.6       |
| alr2525 | -           | unknown protein                                                                         | 5.595       | 15.465      | 4.004             | AR                | -         |
| alr2517 | -           | hypothetical protein                                                                    | 4.892       | 11.291      | 3.402             | c                 | 14.8      |
| asr2513 | <i>fdxB</i> | ferredoxin                                                                              | 4.582       | 9.846       | 3.529             | b                 | 3.6       |
| all1431 | <i>hesB</i> | HesB protein                                                                            | 4.514       | 9.555       | 5.535             | AR                | -         |
| all1430 | <i>fdxH</i> | heterocyst-specific [2Fe-2S] ferredoxin                                                 | 4.481       | 9.415       | 3.950             | AR                | -         |
| all1424 | -           | unknown protein                                                                         | 4.286       | 8.632       | 3.001             | AR                | -         |
| all1454 | <i>nifD</i> | nitrogenase MoFe protein subunit alpha                                                  | 4.198       | 8.300       | 12.159            | AR                | -         |
| asl2052 | -           | unknown protein                                                                         | 4.193       | 8.282       | 7.796             | AR                | -         |
| all1425 | -           | unknown protein                                                                         | 3.247       | 5.320       | 3.979             | AR                | -         |
| asr0905 | -           | hypothetical protein                                                                    | 3.103       | 4.949       | 6.555             | b                 | 18        |
